# Supplementary material for: Strength training as a supplemental therapy for androgen deficiency of the aging male (ADAM): study protocol for a three-arm clinical trial
Source: PubMed Central journal article supplement — BMJ Open. 2019 Sep 5;9(9):e025991. doi: 10.1136/bmjopen-2018-025991 (PMC6731925; doi:10.1136/bmjopen-2018-025991), 2019-09-05
Supplement: bmjopen-2018-025991supp001.pdf [file bmjopen-2018-025991supp001.pdf]

## Additional file 1: Inclusion and exclusion criteria

Subject's Code: 

Subject's Date of Birth:

Subject's Name: 

## Inclusion criteria

- 1A. Newly diagnosed with ADAM syndrome  Yes  No
- 1B. Patient with ADAM syndrome on testosterone replacement therapy  Yes  No
2. 40 - 60 years of age  Yes  No
3. Capable of reading and writing Slovak  Yes  No
4. Treating urologist\endocrinologist has approved the subjects' participation  Yes  No
4. Lives within approximately 1 hour from Bratislava by car or public transportation  Yes  No
6. Written informed consent received  Yes  No

## Exclusion criteria

1. Routine resistance training with manuals  Yes  No
2. Medication for osteoporosis  Yes  No
3. Conditions that contraindicate exercise without adjusted actions  Yes  No
4. Mentally incompetent conditions  Yes  No
5. Conditions complicating ability to participate in a supervised training program  Yes  No
6. Abnormal DRV (digital rectal examination)  Yes  No
7. Serious system deases as
- a) cardiovascular deases  Yes  No
- b) liver and kidneys deases,  Yes  No
- c) diabetes mellius,  Yes  No
- d) oncological deases  Yes  No
- e) or other serious dease according to the judgment of the responsible physician.  Yes  No

Clinician's Signature: \_\_\_\_\_

Date:
