# Supplementary material for: Strength training as a supplemental therapy for androgen deficiency of the aging male (ADAM): study protocol for a three-arm clinical trial
Source: PubMed Central journal article supplement — BMJ Open. 2019 Sep 5;9(9):e025991. doi: 10.1136/bmjopen-2018-025991 (PMC6731925; doi:10.1136/bmjopen-2018-025991), 2019-09-05
Supplement: bmjopen-2018-025991supp002.pdf [file bmjopen-2018-025991supp002.pdf]

## Additional file 2: Outcomes, specific variables and assessments

| Outcomes                                             | Specific variables                                                                                                                                                                                                                                                                                                                                                                                                                                                                                  | Assessments                                                                                                                                                                                                                                          |
|------------------------------------------------------|-----------------------------------------------------------------------------------------------------------------------------------------------------------------------------------------------------------------------------------------------------------------------------------------------------------------------------------------------------------------------------------------------------------------------------------------------------------------------------------------------------|------------------------------------------------------------------------------------------------------------------------------------------------------------------------------------------------------------------------------------------------------|
| <b>CLINICAL OUTCOMES</b>                             |                                                                                                                                                                                                                                                                                                                                                                                                                                                                                                     |                                                                                                                                                                                                                                                      |
| <b>Body composition</b>                              |                                                                                                                                                                                                                                                                                                                                                                                                                                                                                                     |                                                                                                                                                                                                                                                      |
|                                                      | Lean Mass (LM) – primary outcome                                                                                                                                                                                                                                                                                                                                                                                                                                                                    | DXA                                                                                                                                                                                                                                                  |
|                                                      | Fat Mass (FM)                                                                                                                                                                                                                                                                                                                                                                                                                                                                                       | DXA                                                                                                                                                                                                                                                  |
|                                                      | Total Body Mass (TBM)                                                                                                                                                                                                                                                                                                                                                                                                                                                                               | DXA                                                                                                                                                                                                                                                  |
|                                                      | Body Mass Index (BMI)                                                                                                                                                                                                                                                                                                                                                                                                                                                                               | Weight and height                                                                                                                                                                                                                                    |
| <b>The haematological and biochemical parameters</b> | Haemoglobin(g/l), Hematocrits(ratio), Leucocytes (10 <sup>9</sup> /l), Thrombocytes (10 <sup>9</sup> /l), Glucose (mmol/l), Urea (mmol/l), Sodium (mmol/l), Potassium (mmol/l), Calcium (mmol/l), ALAT, Total Cholesterol (mmol/l), LDL Cholesterol (mmol/l), HDL Cholesterol (mmol/l), Triglyceride (mmol/l), Testosterone (nmol/l), Oestrogen (nmol/l), LH (nmol/l), FSH (nmol/l), SHBG (nmol/l), Albumin (g/l), Bilirubin (μmol/l), Total Protein (g/l), CRP(mg/l), Insulin (mIU/l), PSA (ug/l). |                                                                                                                                                                                                                                                      |
| <b>Physical functioning</b>                          |                                                                                                                                                                                                                                                                                                                                                                                                                                                                                                     |                                                                                                                                                                                                                                                      |
|                                                      | Muscle strength                                                                                                                                                                                                                                                                                                                                                                                                                                                                                     | 10-m Usual Walk Test (s)<br>10-m Fast Walk Test (s)<br>Maximal voluntary contraction (MVC) of isometric knee extension (Nm)<br>Maximal voluntary contraction (MVC) of isometric knee flexion (Nm)<br>1RM on leg press (kg)<br>Handgrip strength (kg) |
|                                                      | Cardio-respiratory fitness                                                                                                                                                                                                                                                                                                                                                                                                                                                                          | The Single Stage Treadmill Walking Test (VO <sub>2</sub> max in ml.kg <sup>-1</sup> .min <sup>-1</sup> )                                                                                                                                             |
| <b>Psycho-social functioning</b>                     |                                                                                                                                                                                                                                                                                                                                                                                                                                                                                                     |                                                                                                                                                                                                                                                      |
|                                                      | Symptoms of ADAM                                                                                                                                                                                                                                                                                                                                                                                                                                                                                    | Aging Males' Symptom (AMS) Scale                                                                                                                                                                                                                     |
|                                                      | HRQoL                                                                                                                                                                                                                                                                                                                                                                                                                                                                                               | SF-36                                                                                                                                                                                                                                                |
| Muscle cellular outcomes                             |                                                                                                                                                                                                                                                                                                                                                                                                                                                                                                     |                                                                                                                                                                                                                                                      |
| <b>Muscle fibre size</b>                             | Muscle fibre cross sectional area (primary cellular outcome)                                                                                                                                                                                                                                                                                                                                                                                                                                        | Cross sections of muscle biopsies                                                                                                                                                                                                                    |
| <b>Regulators of muscle fibre size</b>               |                                                                                                                                                                                                                                                                                                                                                                                                                                                                                                     |                                                                                                                                                                                                                                                      |
| Number of myonuclei per muscle fibre                 |                                                                                                                                                                                                                                                                                                                                                                                                                                                                                                     | Number of myonuclei per muscle fibre                                                                                                                                                                                                                 |
| Number of satellite cells per muscle fibre           |                                                                                                                                                                                                                                                                                                                                                                                                                                                                                                     | Cross sections of muscle biopsies                                                                                                                                                                                                                    |

|                                                                         |  |                                   |
|-------------------------------------------------------------------------|--|-----------------------------------|
| Number of satellite cells and myonuclei positive for androgen receptors |  | Cross sections of muscle biopsies |
|-------------------------------------------------------------------------|--|-----------------------------------|

DXA - Dual-energy X-ray Absorptiometry, LDL - Low Density Lipoprotein, HDL - High Density Lipoprotein, LH - Luteinizing Hormone, FSH - Follicle Stimulating Hormone, SHBG - Sex Hormone-Binding Globulin, CRP - C- Reactive Protein, PSA - Prostate Specific Antigen, ADAM – androgen deficiency in aging male, HRQoL – Health-Related Quality of Life.
